# Supplementary material
Source: PubMed Central journal article supplement (PMC3587328)

### SUPPLEMENTAL FIGURE 1

**Glutathione redox state of normal and SS RBCs.** Measurement of total glutathione (GSH + GSSG) and GSSG alone (with calculation of GSH) in washed RBCs exposed to HX/XO. Glutathione-related parameters include half-cell reduction potential ( $E_{hc}$ ) (**A, B**),  $GSH_{Total}$  (GSH + GSSG) (**C, D**), GSH alone (**E, F**), and GSSG alone (**G, H**). Data plotted as means  $\pm$  SEM; (n = 5 – 8) \*  $p < 0.05$  normal vs sickle cell control; +  $p < 0.05$  normal HX/XO exposed vs sickle cell HX/XO exposed.

### SUPPLEMENTAL FIGURE 2

**NADP/NADPH redox state of healthy control and SS RBCs.** Measurement of  $NADP_{Total}$  (free cytosolic NADP + NADPH) and NADPH alone (free cytosolic and protein bound) in washed RBC exposed to HX/XO. NADP/NADPH-related parameters include half cell reduction potential (**A, B**),  $NADP_{Total}$  ( $NADP^+$  + free cytosolic NADPH) (**C, D**), and NADPH alone (free cytosolic and protein bound) (**E, F**). Data plotted as means  $\pm$  SEM; (n = 5 – 8) \*  $p < 0.05$  normal control vs sickle cell control; +  $p < 0.05$  normal HX/XO exposed vs sickle cell HX/XO exposed.

### SUPPLEMENTAL FIGURE 3

**Glutathione recycling in sickle cell RBCs is enhanced by channeling energy metabolism through the hexose monophosphate pathway.** Measurement of total glutathione (GSH + GSSG) and GSSG alone (with calculation of GSH) in washed RBCs exposed to HX/XO or washed RBCs pre-incubated with KA (15 $\mu$ M final KA in 10% Hct RBC suspension, 37°C for 1 hour), prior to HX/XO exposure. Glutathione-related parameters include half cell reduction potential (**A, B**),  $GSH_{Total}$  (GSH + GSSG) (**C, D**), GSH alone (**E, F**), and GSSG alone (**G, H**). Data plotted as means  $\pm$  SEM; (n = 3 – 5) \*  $p < 0.05$  sickle cell HX/XO exposed vs KA-treated sickle cell HX/XO exposed).

#### SUPPLEMENTAL FIGURE 4

**Standardization of GAPDH activity assay and GAPDH inhibition by cdB3 peptide.** A peptide limited to residues 1-12 of the band 3 NH<sub>2</sub> terminus was added at a final concentration (1-100μM) to GAPDH (24nM, final) from human erythrocytes (Sigma), in a total buffer volume of 1ml (10 mM imidazole acetate, 0.1 mM EDTA, 0.5 mM sodium arsenate, 1 mM sodium phosphate pH 7). Following 5 minute incubation, NAD<sup>+</sup> and G3P were added to start the reaction. Kinetic activity of GAPDH was measured monitoring absorbance at 340nm. **(A)** Standard curve of enzyme activity in the assay. **(B)** Inhibition of enzyme activity by the peptide.

#### SUPPLEMENTAL FIGURE 5

**<sup>1</sup>H NMR spectra indicating positional <sup>13</sup>C-enrichment in lactate isotopomers generated following HMP stimulation in normal and SSRBCs.** As described in the text, RBCs were incubated with [2-<sup>13</sup>C]-Glucose to generate pathway-specific lactate isotopomers (e.g. Q2→EMP, Q3→HMP). **(A-D)** Both normal and SSRBCs were studied (+/- MB to stimulate the HMP); representative spectra for each condition are shown (please refer to Figure 2 for description of raw signal processing and spectral deconvolution). For both RBC populations (normal and SS), we observed expected shifts in peak amplitude (↓Q2, ↑Q3) with MB stimulation; however, this shift is appreciably blunted in spectra obtained from MB-stimulated SSRBCs (please refer to Table 1, for HMP flux calculations). Note, while other small metabolites could contaminate the isotopomer pattern [most notably alanine (CH<sub>3</sub> <sup>1</sup>H signal expected at 1.46 ppm) and β-hydroxybutarate (CH<sub>3</sub> <sup>1</sup>H signal expected at 1.19 ppm)], we did not find this to be a problem.

## SUPPLEMENTAL FIGURE 6

**B3 Tyrosine phosphorylation is O<sub>2</sub>-responsive and partially accounts for blunted EMP activation in deoxyRBCs.** Washed RBCs were incubated in phosphatase inhibitor buffer; RBC O<sub>2</sub> content was manipulated and membrane proteins were extracted for immunoblotting and densitometry. **(A)** B3 pTyr densitometry is referenced to normal, oxygenated RBCs and is noted to increase with deoxygenation. In SSRBCs, pTyr density is increased at rest, and markedly so upon deoxygenation (25X level observed in normal, oxygenated RBCs). **(B)** We compared the influence of O<sub>2</sub> content and B3 phosphorylation (incubation with the phosphatase inhibitor O-vanadate) upon maximum HMP flux in normal RBCs (HMP was stimulated with methylene blue (MB)) [see text, Figure 2 and Table 1 for methodology and HMP flux calculations]. Maximum HMP flux was attenuated somewhat by O-vanadate incubation, but far less so than the attenuation observed by deoxygenation. This result suggests that while cdB3 phosphorylation displaces GAPDH to a degree (with consequent HMP constraint, see Figure 7 for full pathway schema); RBC O<sub>2</sub> content must also change to elicit the full HMP flux dampening observed in deoxygenated RBCs.

## SUPPLEMENTAL FIGURE 7

**Glucose utilization and lactate production in normal and SS RBCs.** As described in the text, RBCs were incubated with glucose, the samples centrifuged and the supernatant collected. Glucose remaining and lactate accumulated (in the supernatant) was measured (by <sup>1</sup>H NMR analysis and with either the Amplex Red Glucose Assay Kit, Invitrogen or the EnzyFluo D-Lactate Assay Kit, BioAssay Systems, Hayward, CA). Correlation between NMR and **(A)** glucose measurements made by the Amplex Red glucose kit assay and **(B)** lactate measurements made by the EnzyFluo D-Lactate kit, demonstrating assay concordance. We determined glucose uptake over time for oxygenated normal and SS RBCs. **(C)** Glucose remaining in the extracellular media was plotted as a function of incubation time; the regression line slope (uptake rate) demonstrates a compensatory increase in glucose uptake by SS RBCs. **(D)** Lactate generation is plotted as a function of glucose uptake in oxygenated and deoxygenated normal RBCs (+/- MB; +/- KA); GPADH inhibition by KA significantly diminishes both glucose uptake and lactate production (distal EMP metabolism is required for lactate production, see Figure 7).

SUPPLEMENTAL FIGURES

FIGURE 1

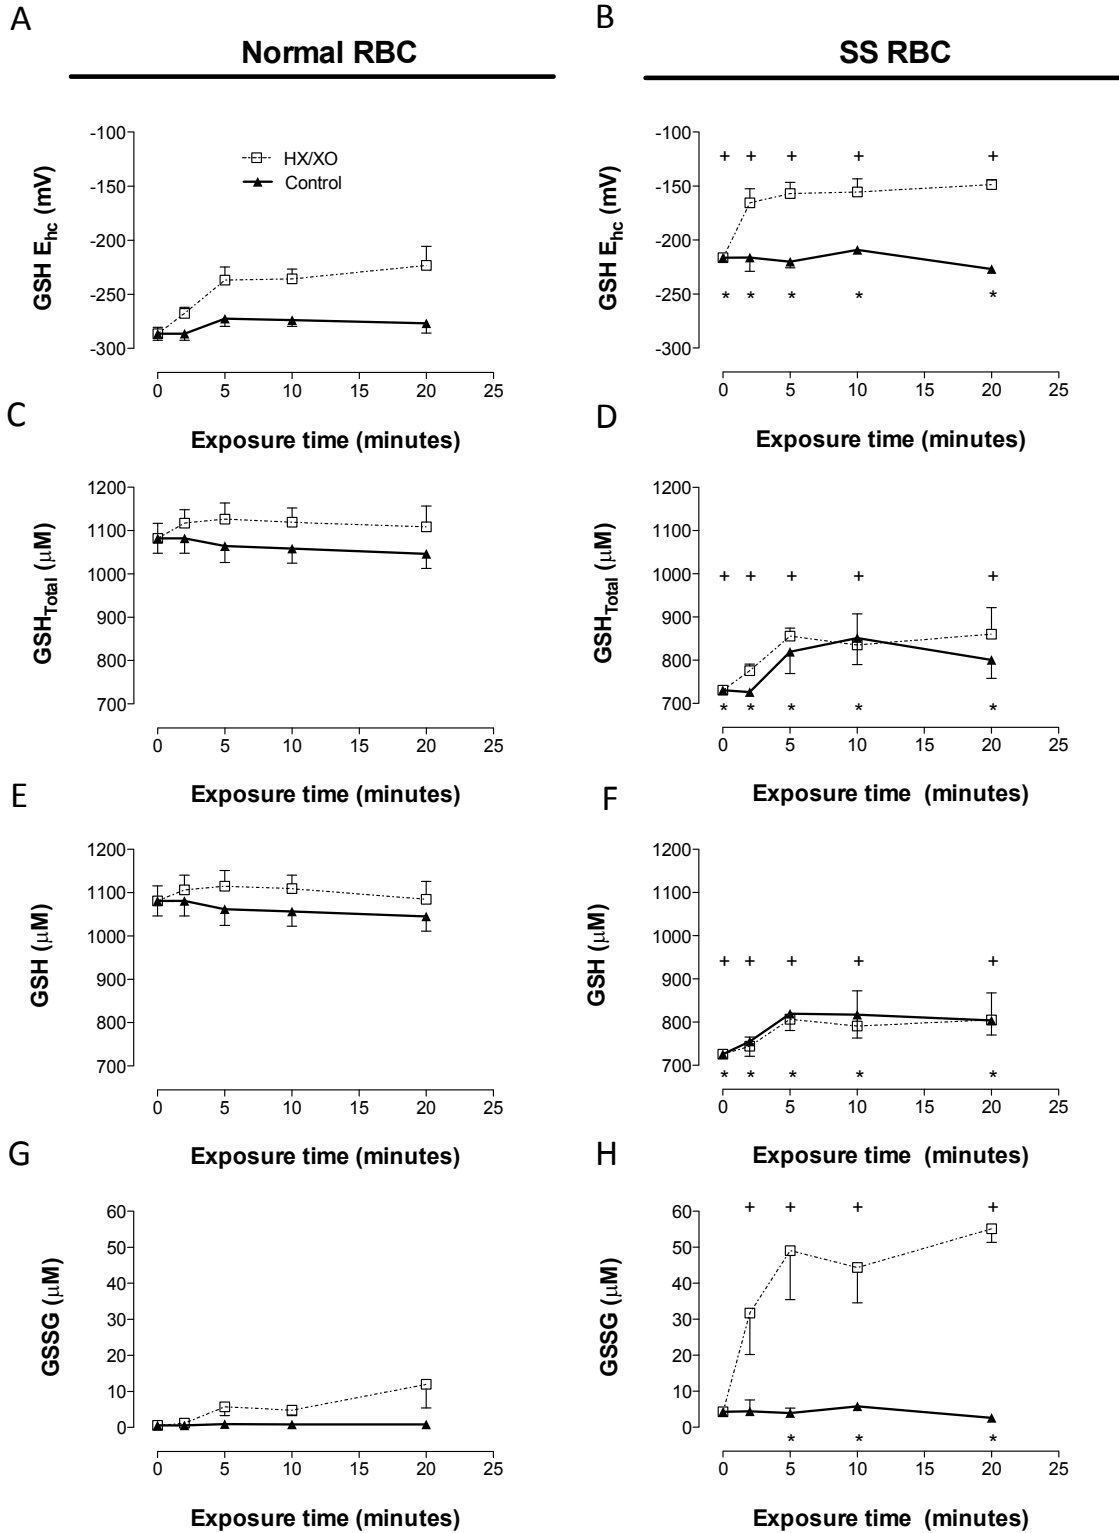

FIGURE 2

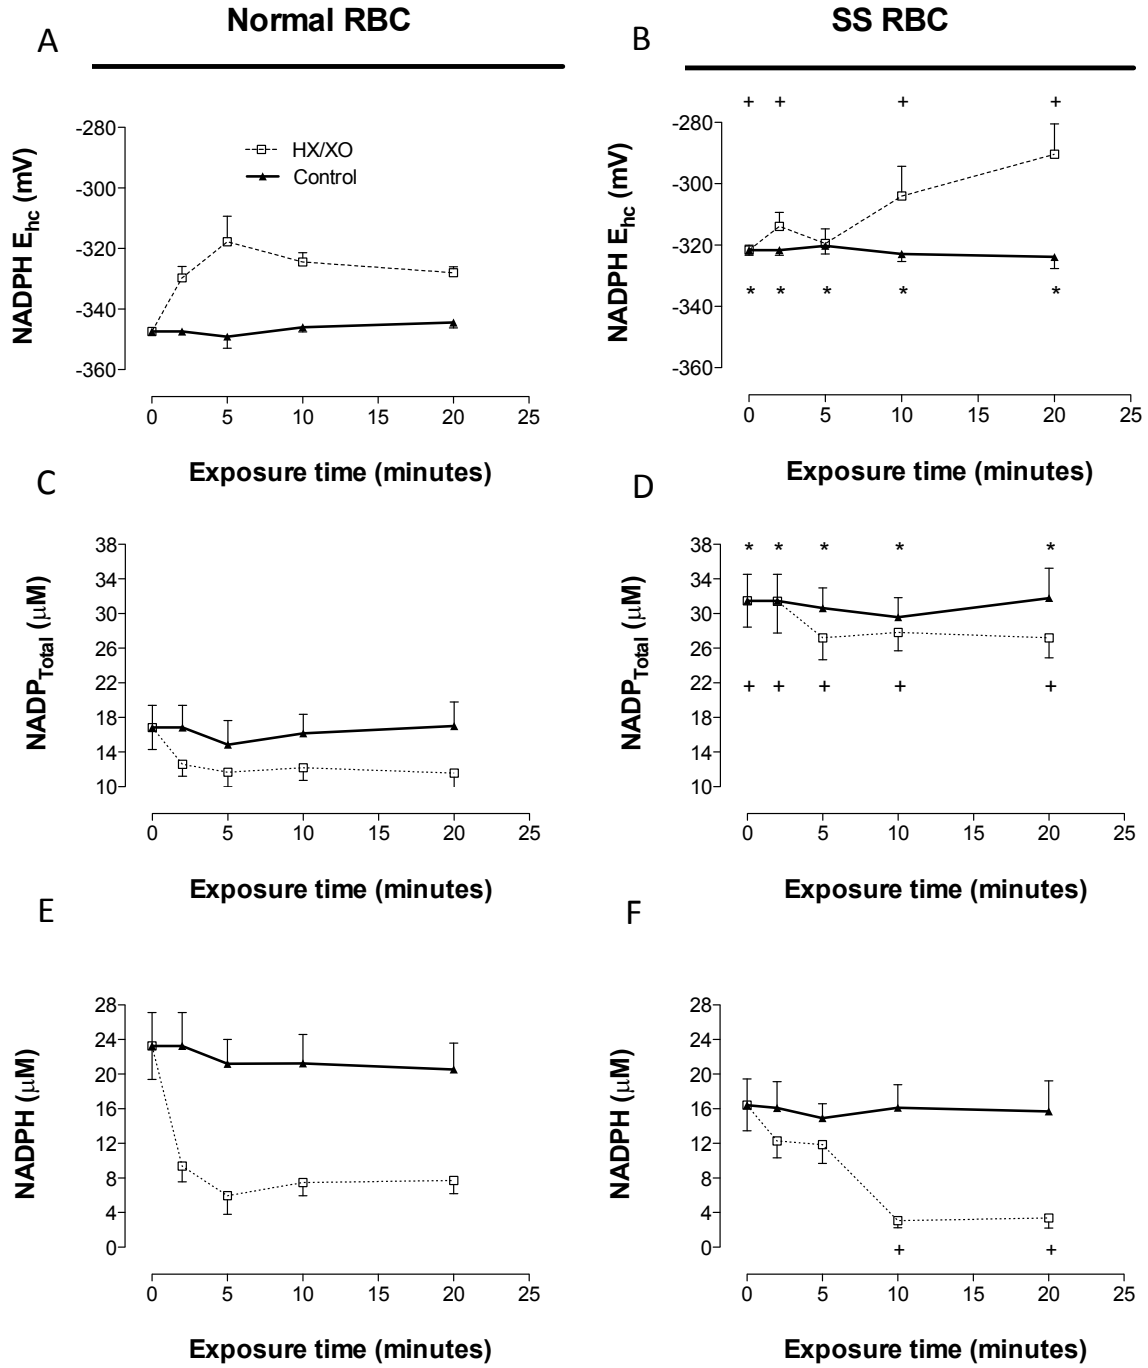

FIGURE 3

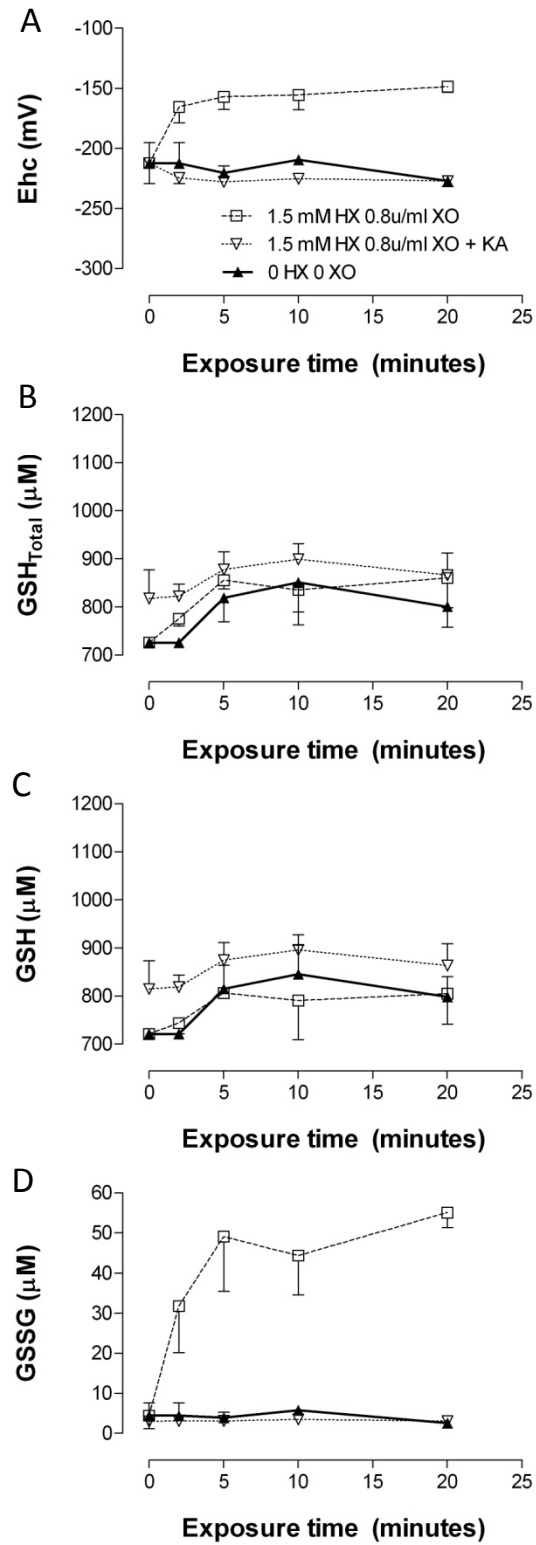

FIGURE 4

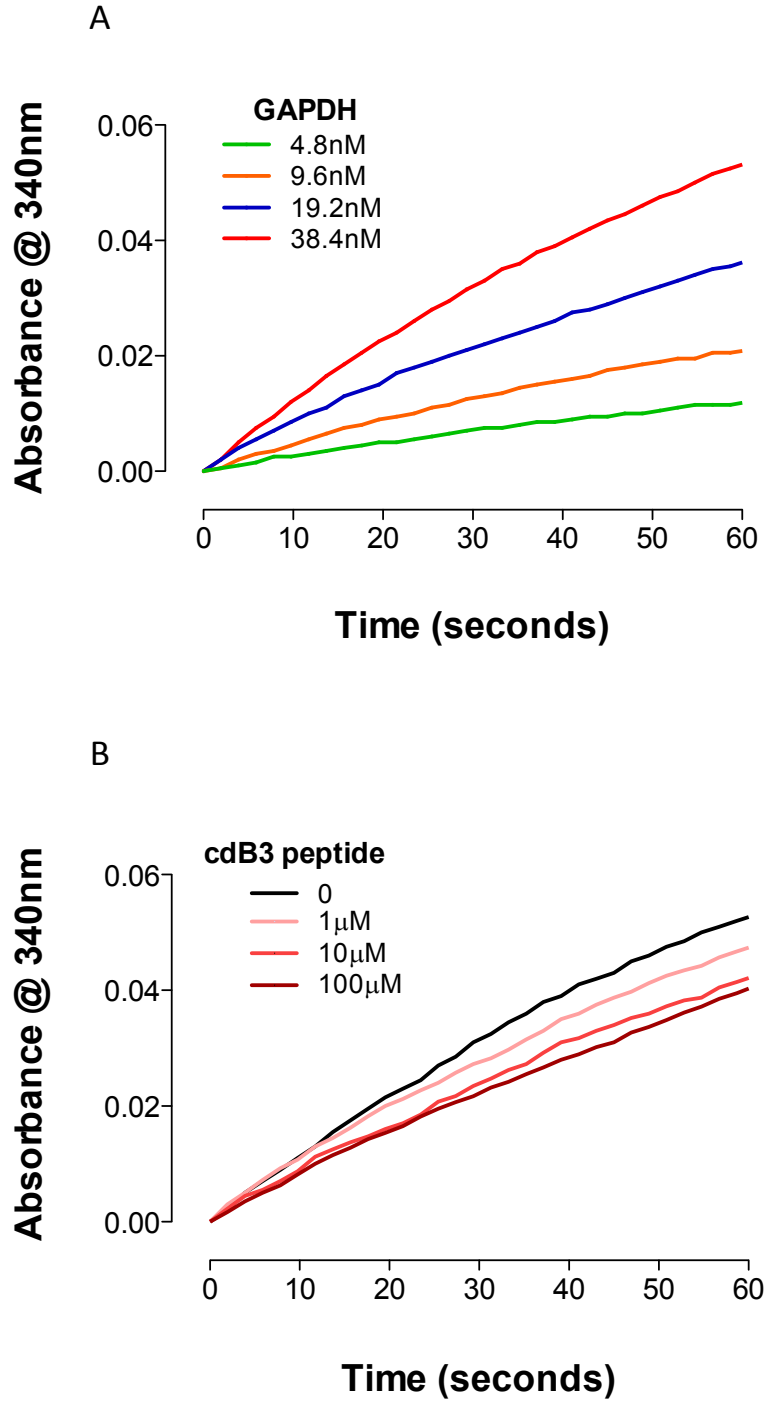

FIGURE 5

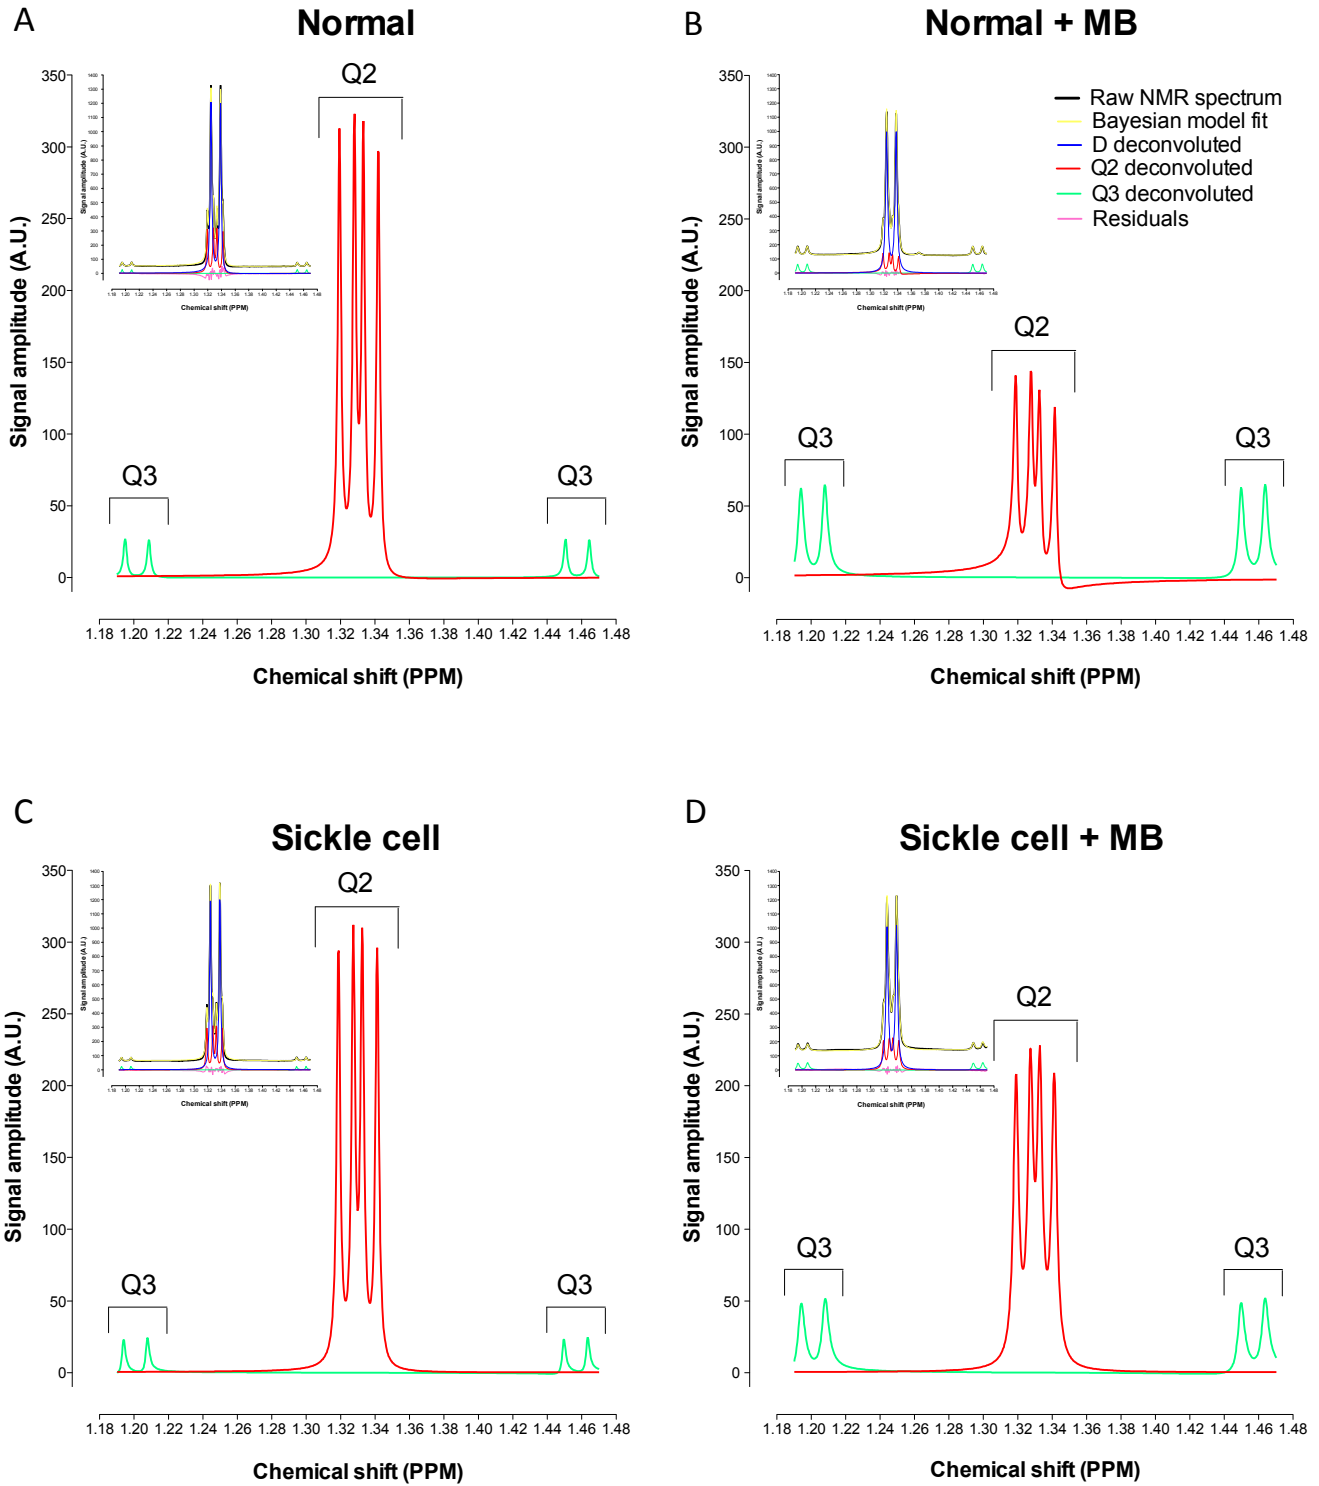



FIGURE 6

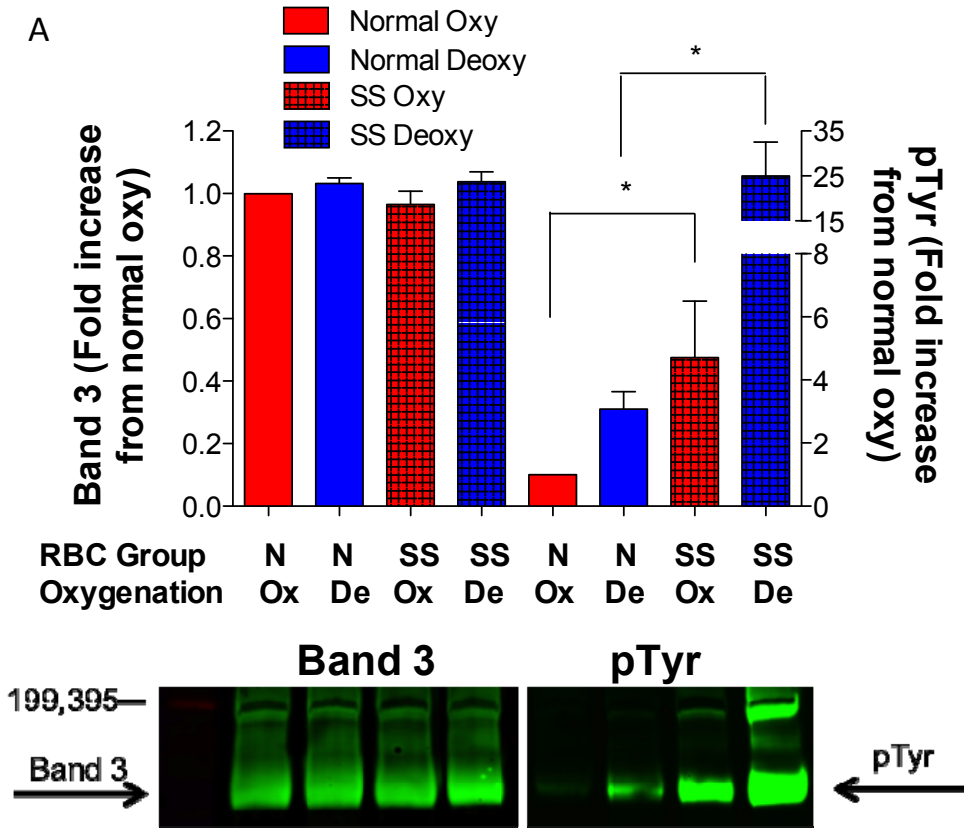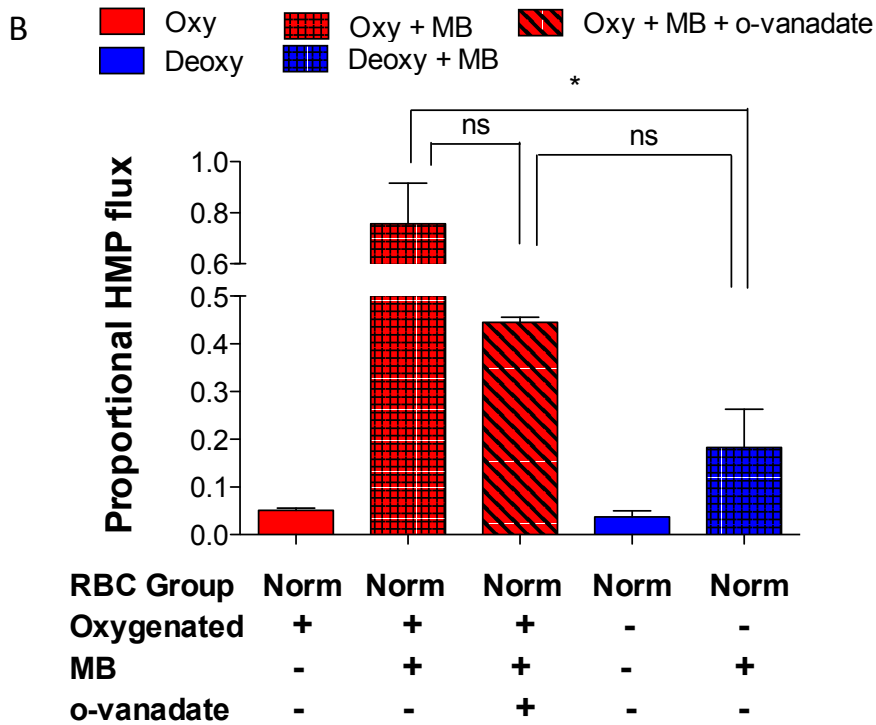

**FIGURE 7**

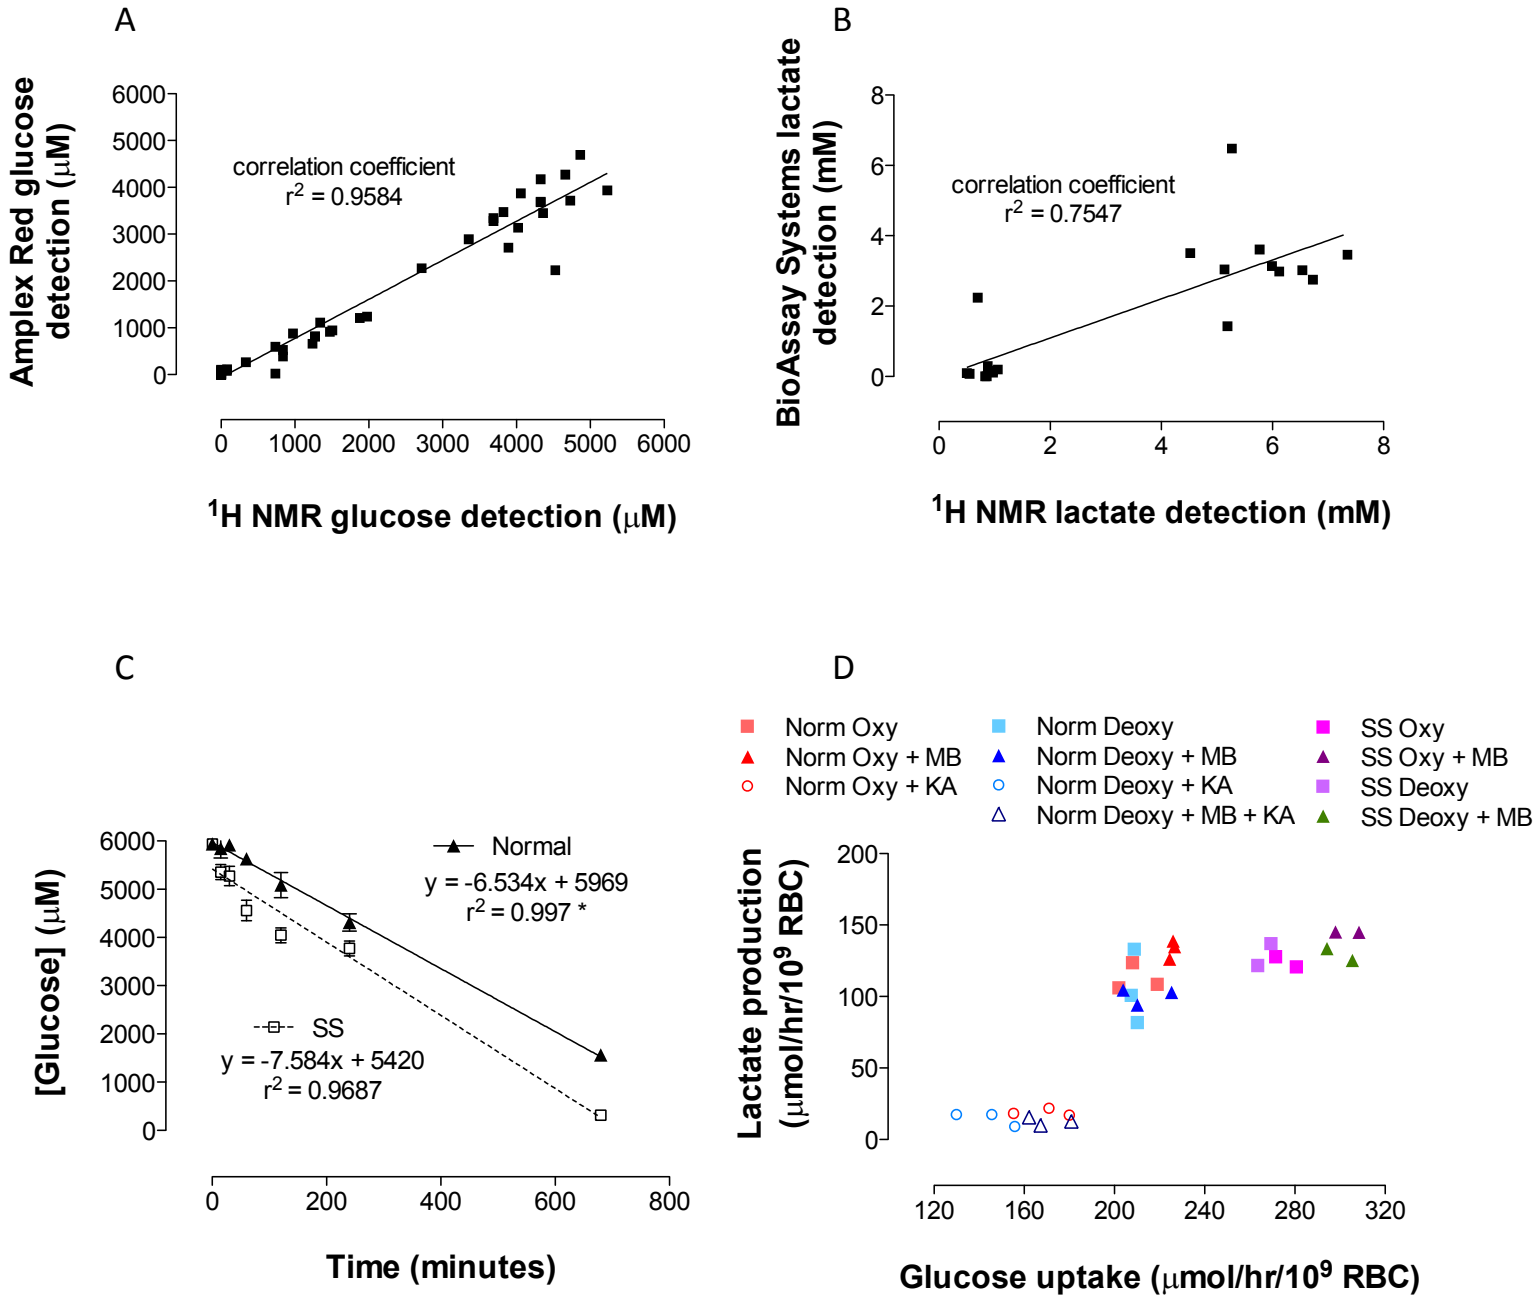

Supplement: supp_blood-2012-02-414037_blood-2012-02-414037-1.pdf [file supp_blood-2012-02-414037_blood-2012-02-414037-1.pdf]
